# Supplementary material for: Defect-related ferromagnetism in ultrathin metal-free g-C3N4 nanosheets
Source: Royal Society of Chemistry journal article supplement (doi:10.1039/c3nr04743a), 2014-01-01
Supplement: c3nr04743a.pdf [file c3nr04743a.pdf]

## Supplementary Information

### Defect-related ferromagnetism in ultrathin metal-free g-C<sub>3</sub>N<sub>4</sub> nanosheets

Daqiang Gao, Qiang Xu, Jing Zhang, Zhaolong Yang, Mingsu Si\*, Zhongjie Yan, and Desheng Xue\*

Key Laboratory for Magnetism and Magnetic Materials of MOE, Lanzhou University, Lanzhou 730000, P. R. China. Fax: +86 0931 8912237; Tel: +86 0931 8912237; \*E-mail: [xueds@lzu.edu.cn](mailto:xueds@lzu.edu.cn); [sims@lzu.edu.cn](mailto:sims@lzu.edu.cn).

1. Table S1. ICP results for the g-C<sub>3</sub>N<sub>4</sub> nanosheets.
2. Fig. S2 Field dependence of the ZFC and FC curves for g-C<sub>3</sub>N<sub>4</sub> nanosheets (S450).
3. Fig. S3 Primitive *M-H* curves for g-C<sub>3</sub>N<sub>4</sub> nanosheets measured at different temperatures (S450).

| Element content<br>(ppm) | Fe  | Co  | Ni  | Mn  | Cr  |
|--------------------------|-----|-----|-----|-----|-----|
| First                    | 7.8 | 2.8 | 0.8 | 0.2 | 1.4 |
| Second                   | 8.5 | 2.8 | 0.9 | 0.3 | 1.5 |

Table S1. ICP results for the g-C<sub>3</sub>N<sub>4</sub> nanosheets.

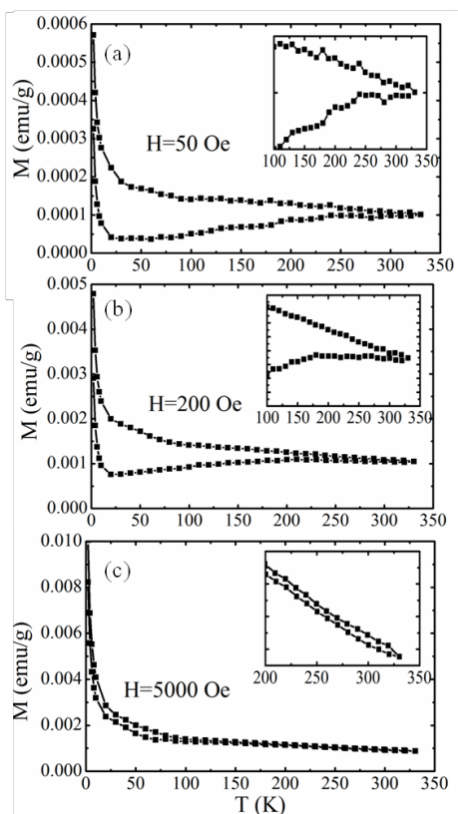

Fig. S2 Field dependence of the ZFC and FC curves for g-C<sub>3</sub>N<sub>4</sub> nanosheets (S450).

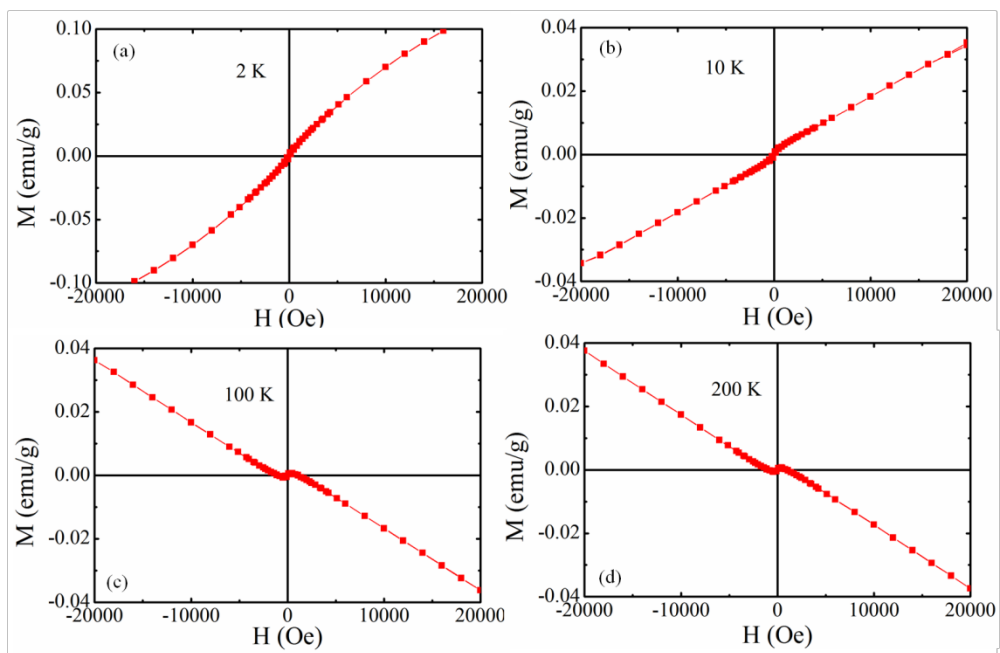

**Fig. S3** Primitive  $M$ - $H$  curves for  $g\text{-C}_3\text{N}_4$  nanosheets measured at different temperatures (S450).
